# Supplementary material for: Development of genus-specific universal primers for the detection of flaviviruses
Source: Springer Nature journal article supplement (doi:10.1186/s12985-021-01646-5), 2021-09-15
Supplement: MOESM1 [file 19665796]

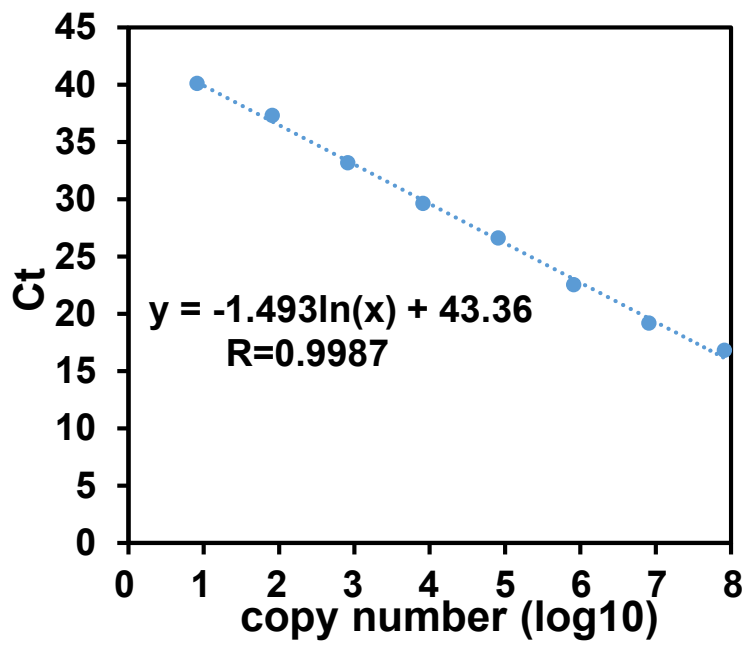

Figure S1.
